# Supplementary material for: Hydrogenation of β-Keto Sulfones to β-Hydroxy Sulfones with Alkyl Aluminum Compounds: Structure of Intermediate Hydroalumination Products
Source: MDPI journal article supplement (doi:10.3390/molecules27072357), 2022-04-06
Supplement: s1 [file s1]

# Hydrogenation of $\beta$ -Keto Sulfones to $\beta$ -Hydroxy Sulfones with Alkyl Aluminum Compounds: Structure of Intermediate Hydroalumination Products

Michał Kotecki <sup>1</sup>, Zbigniew Ochal <sup>1</sup>, Paweł Socha <sup>2</sup>, Vadim Szejko <sup>1</sup>, Łukasz Dobrzycki <sup>2</sup>, Mariola Stypik <sup>1</sup> and Wanda Ziemkowska <sup>1,\*</sup>

<sup>1</sup> Faculty of Chemistry, Warsaw University of Technology, Noakowskiego 3, 00-664 Warsaw, Poland; [michal.kotecki2.stud@pw.edu.pl](mailto:michal.kotecki2.stud@pw.edu.pl) (M.K.); [zbigniew.ochal@pw.edu.pl](mailto:zbigniew.ochal@pw.edu.pl) (Z.O.); [vsheiko@ch.pw.edu.pl](mailto:vsheiko@ch.pw.edu.pl) (V.S.), [mariola.stypik.dokt@pw.edu.pl](mailto:mariola.stypik.dokt@pw.edu.pl) (M.S.)

<sup>2</sup> Department of Chemistry, University of Warsaw, Pasteura 1, 02-093 Warsaw, Poland; [psocha@chem.uw.edu.pl](mailto:psocha@chem.uw.edu.pl) (P.S.), [dobrzyc@chem.uw.edu.pl](mailto:dobrzyc@chem.uw.edu.pl) (Ł.D.)

\* Correspondence: [ziemk@ch.pw.edu.pl](mailto:ziemk@ch.pw.edu.pl) or [wanda.ziemkowska@pw.edu.pl](mailto:wanda.ziemkowska@pw.edu.pl)

## Table of contents:

Characterization of  $\beta$ -keto sulfones **1a-1e**.

Characterization of  $\beta$ -hydroxy sulfones **4a-4e**.

Figure S1. <sup>1</sup>H NMR spectrum of the compound **2aa** – hydroalumination product of a  $\beta$ -keto sulfone **1a** with *i*-Bu<sub>3</sub>Al.

Figure S2. <sup>1</sup>H NMR spectrum of the compound **2aa** – expanded part of the spectrum showing *i*-BuAl proton signals.

Figure S3. <sup>13</sup>C NMR spectrum of the compound **2aa**.

Figure S4. <sup>1</sup>H NMR spectrum of the compound **2ab** – hydroalumination product of a  $\beta$ -keto sulfone **1b** with *i*-Bu<sub>3</sub>Al.

Figure S5. <sup>1</sup>H NMR spectrum of the compound **2ab** – expanded part of the spectrum showing *i*-BuAl proton signals.

Figure S6. <sup>13</sup>C NMR spectrum of the compound **2ab**

Figure S7. <sup>1</sup>H NMR spectrum of the compound **2ba** – hydroalumination product of a  $\beta$ -keto sulfone **1a** with Et<sub>3</sub>Al (1:1).

Figure S8. <sup>1</sup>H NMR spectrum of the compound **2ba** – expanded part of the spectrum showing EtAl proton signals.

Figure S9. <sup>13</sup>C NMR spectrum of the compound **2ba**.

Figure S10.  $^1\text{H}$  NMR spectrum of the compound **2bb** – hydroalumination product of a  $\beta$ -keto sulfone **1b** with  $\text{Et}_3\text{Al}$  (1:1).

Figure S11.  $^1\text{H}$  NMR spectrum of the compound **2bb** – expanded part of the spectrum showing EtAl proton signals.

Figure S12.  $^{13}\text{C}$  NMR spectrum of the compound **2bb**.

Figure S13.  $^1\text{H}$  NMR spectrum of the compound **3bb** – hydroalumination product of a  $\beta$ -keto sulfone **1b** with  $\text{Et}_3\text{Al}$  (1:2).

Figure S14.  $^1\text{H}$  NMR spectrum of the compound **3bb** – expanded part of the spectrum showing EtAl proton signals.

Figure S15.  $^{13}\text{C}$  NMR spectrum of the compound **3bb**.

### Characterization of $\beta$ -keto sulfones **1a-1e**.

2-(*p*-Tolylsulfonyl)acetophenone (**1a**)  $^1\text{H}$  NMR  $\delta$ : 7.95 (2H, dd,  $J_{3\text{H}} = 8.2$  Hz,  $J_{4\text{H}} = 1.4$  Hz,  $\text{H}_{\text{aromat}}$ ), 7.77 (2H, d,  $J_{3\text{H}} = 8.2$  Hz,  $\text{H}_{\text{aromat}}$ ), 7.63 (2H, m,  $\text{H}_{\text{aromat}}$ ), 7.49 (3H, m,  $\text{H}_{\text{aromat}}$ ), 7.34 (2H, d,  $J_{3\text{H}} = 7.6$  Hz,  $\text{H}_{\text{aromat}}$ ), 4.72 (2H, s,  $\text{CH}_2$ ), 2.45 (3H, s,  $\text{CH}_3\text{Ph}$ ).  $^{13}\text{C}$  NMR  $\delta$ : 192.43 ( $\text{C}=\text{O}$ ), 141.16, 135.91, 134.28, 134.17, 131.32, 129.20, 129.14, 128.84 ( $\text{C}_{\text{aromat}}$ ), 64.94 ( $\text{CH}_2$ ), 13.32 ( $\text{CH}_3\text{Ph}$ ) ppm. Mp.: 135-136°C.

2-(*p*-Chlorosulfonyl)acetophenone (**1b**)  $^1\text{H}$  NMR  $\delta$ : 7.93 (2H, dd,  $J_{3\text{H}} = 8.5$  Hz,  $J_{4\text{H}} = 1.4$  Hz,  $\text{H}_{\text{aromat}}$ ), 7.83 (2H, d,  $J_{3\text{H}} = 8.5$  Hz,  $\text{H}_{\text{aromat}}$ ), 7.64 (1H, m,  $\text{H}_{\text{aromat}}$ ), 7.53-7.47 (4H, m,  $\text{H}_{\text{aromat}}$ ), 4.75 (2H, s,  $\text{CH}_2$ ).  $^{13}\text{C}$  NMR  $\delta$ : 187.87 ( $\text{C}=\text{O}$ ), 141.08, 136.93, 135.46, 134.54, 130.14, 129.49, 129.21, 128.91 ( $\text{C}_{\text{aromat}}$ ), 63.23 ( $\text{CH}_2$ ) ppm. Mp.: 107-108°C.

2-(*p*-Tolylsulfonyl)acetone (**1c**)  $^1\text{H}$  NMR  $\delta$ : 7.75 (2H, d,  $J_{3\text{H}} = 8.0$  Hz,  $\text{H}_{\text{aromat}}$ ), 7.36 (2H, d,  $J_{3\text{H}} = 8.0$  Hz,  $\text{H}_{\text{aromat}}$ ), 4.13 (2H, s,  $\text{CH}_2$ ), 2.44 (3H, s,  $\text{CH}_3\text{Ph}$ ).  $^{13}\text{C}$  NMR  $\delta$ : 196.14 ( $\text{C}=\text{O}$ ), 145.50, 135.58, 129.99, 128.19 ( $\text{C}_{\text{aromat}}$ ), 67.83 ( $\text{CH}_2$ ), 31.47 ( $\text{C}(\text{O})\text{CH}_3$ ), 21.68 ( $\text{PhCH}_3$ ) ppm. Mp.: 56-57°C.

2-(*p*-Tolylsulfonyl)-2-(phenyl)acetophenone (**1d**)  $^1\text{H}$  NMR  $\delta$ : 7.88 (2H, d,  $J_{3\text{H}} = 7.3$  Hz,  $\text{H}_{\text{aromat}}$ ), 7.52-7.19 (12H, m,  $\text{H}_{\text{aromat}}$ ), 6.13 (1H, s, CH), 2.40 (3H, s,  $\text{CH}_3\text{Ph}$ ).  $^{13}\text{C}$  NMR  $\delta$ : 190.75 ( $\text{C}=\text{O}$ ), 145.00, 135.99, 133.91, 133.79, 130.38, 130.30, 129.56, 128.99, 128.83, 128.79, 128.73, 128.59 ( $\text{C}_{\text{aromat}}$ ), 76.05 ( $\text{CH}_2$ ), 21.68 ( $\text{CH}_3\text{Ph}$ ) ppm. Mp.: 150-154°C.

2-(*p*-Tolylsulfonyl)-2-(methyl)acetophenone (**1e**)  $^1\text{H}$  NMR  $\delta$ : 7.96 (2H, d,  $J_{3\text{H}} = 7.8$  Hz,  $\text{H}_{\text{aromat}}$ ), 7.64 (2H, d,  $J_{3\text{H}} = 7.8$  Hz,  $\text{H}_{\text{aromat}}$ ), 7.59 (1H, m,  $\text{H}_{\text{aromat}}$ ), 7.46 (2H, m,  $\text{H}_{\text{aromat}}$ ), 7.29 (2H, d,  $J_{3\text{H}} = 7.7$  Hz,  $\text{H}_{\text{aromat}}$ ), 5.16 (1H, q,  $J_{3\text{H}} = 6.7$  Hz,  $\text{C}(\text{H})\text{CH}_3$ ), 2.41 (3H, s,  $\text{CH}_3\text{Ph}$ ), 1.54 (3H, d,  $J_{3\text{H}} = 6.7$  Hz,  $\text{C}(\text{H})\text{CH}_3$ ).  $^{13}\text{C}$  NMR  $\delta$ : 192.59 ( $\text{C}=\text{O}$ ), 145.34, 136.17, 134.00, 132.95, 129.75, 129.53, 129.14, 128.80 ( $\text{C}_{\text{aromat}}$ ), 64.86 ( $\text{C}(\text{H})\text{CH}_3$ ), 21.67 ( $\text{CH}_3\text{Ph}$ ), 13.17 ( $\text{C}(\text{H})\text{CH}_3$ ) ppm. Mp.: 103-105°C.

### Characterization of $\beta$ -hydroxy sulfones 4a-4e.

2-((4-Methylphenyl)sulfonyl)-1-phenylethanol (**4a**)  $^1\text{H}$  NMR  $\delta$ : 7.81 (2H, d,  $J = 8.2$  Hz  $\text{H}_{\text{aromat}}$ ), 7.38 (2H, d,  $J = 8.2$  Hz,  $\text{H}_{\text{aromat}}$ ), 7.29 (5H, m,  $\text{H}_{\text{aromat}}$ ), 5.25 (1H, d,  $J = 10.4$  Hz,  $\text{CH}_2\text{CH}(\text{OH})$ ), 3.74 (1H, s,  $\text{OH}$ ), 3.48 (1H, dd,  $J = 14.2, 10.2$   $\text{CH}_2$ ), 3.32 (1H, dd,  $J = 14.2, 1.3$ ,  $\text{CH}_2$ ), 2.46 (3H, s,  $\text{CH}_3\text{Ph}$ ).  $^{13}\text{C}$  NMR  $\delta$ : 145.25, 140.61, 136.05, 130.08, 128.72, 128.28, 127.98, 125.62 ( $\text{C}_{\text{aromat}}$ ), 68.43 ( $\text{SO}_2\text{CH}_2$ ), 63.94 ( $\text{COH}$ ), 21.68 ( $\text{CH}_3\text{Ph}$ ) ppm. Mp.: 74-75°C.

2-((4-Chlorophenyl)sulfonyl)-1-phenylethanol (**4b**)  $^1\text{H}$  NMR  $\delta$ : 7.88 (2H, d,  $J_{3\text{H}} = 8.2$  Hz  $\text{H}_{\text{aromat}}$ ), 7.55 (2H, d,  $J_{3\text{H}} = 8.2$  Hz,  $\text{H}_{\text{aromat}}$ ), 7.30 (5H, m,  $\text{H}_{\text{aromat}}$ ), 5.28 (1H, d,  $J_{3\text{H}} = 10.4$  Hz,  $\text{CH}_2\text{CH}(\text{OH})$ ), 3.55-3.32 (3H, m,  $\text{OH}$ ,  $\text{CH}_2\text{CH}(\text{OH})$ ).  $^{13}\text{C}$  NMR  $\delta$ : 140.87, 140.45, 137.69, 129.73, 129.53, 128.83, 128.48, 125.62 ( $\text{C}_{\text{aromat}}$ ), 68.55 ( $\text{CH}_2\text{CH}(\text{OH})$ ), 63.93 ( $\text{CH}_2\text{CH}(\text{OH})$ ) ppm. Mp.: 105-107°C.

1-((4-methylphenyl)sulfonyl)-2-propanol (**4c**)  $^1\text{H}$  NMR  $\delta$ : 7.79 (2H, d,  $J_{3\text{H}} = 8.0$  Hz  $\text{H}_{\text{aromat}}$ ), 7.37 (2H, d,  $J_{3\text{H}} = 8.0$  Hz,  $\text{H}_{\text{aromat}}$ ), 4.29 (1H, m,  $\text{CH}_2\text{CH}(\text{OH})$ ), 3.46 (1H, s, broad,  $\text{OH}$ ), 3.23-3.11 (2H, m,  $\text{CH}_2\text{CH}(\text{OH})$ ), 2.45 (3H, s,  $\text{CH}_3\text{Ph}$ ), 1.22 (3H, d,  $J_{3\text{H}} 6.2$  Hz,  $\text{C}(\text{OH})\text{CH}_3$ ).  $^{13}\text{C}$  NMR  $\delta$ : 145.22, 136.00, 130.06, 127.92 ( $\text{C}_{\text{aromat}}$ ), 63.31 ( $\text{SO}_2\text{CH}_2$ ), 62.33 ( $\text{CH}_2\text{CH}(\text{OH})$ ), 22.48 ( $\text{CH}(\text{OH})\text{CH}_3$ ), 21.66 ( $\text{PhCH}_3$ ) ppm. Mp.: 56-57°C.

2-((4-Methylphenyl)sulfonyl)(2-phenyl)-1-phenylethanol (**4d**)  $^1\text{H}$  NMR  $\delta$ : 7.51-6.89 (14H, m,  $\text{H}_{\text{aromat}}$ ), 5.73 (1H, d,  $J_{3\text{H}} = 9.0$  Hz,  $\text{C}(\text{H})\text{OH}$ ), 4.68 (1H, s,  $\text{OH}$ ), 4.43 (1H, d,  $J_{3\text{H}} = 9.0$  Hz,  $\text{C}(\text{H})\text{Ph}$ ), 2.37 (3H, s,  $\text{CH}_3\text{Ph}$ ).  $^{13}\text{C}$  NMR  $\delta$ : 144.99, 139.48, 134.41, 130.28, 129.34, 128.92, 128.77, 128.45, 128.10, 128.06, 128.03, 127.38 ( $\text{C}_{\text{aromat}}$ ), 77.40 ( $\text{C}(\text{H})\text{Ph}$ ), 73.82 ( $\text{C}(\text{H})\text{OH}$ ), 21.65 ( $\text{CH}_3\text{Ph}$ ) ppm. Mp.: 159-160 °C.

2-((4-Methylphenyl)sulfonyl)(2-methyl)-1-phenylethanol (**4e**)  $^1\text{H}$  NMR  $\delta$ : 7.83 (2H, d,  $J_{3\text{H}} = 8.0$  Hz,  $\text{H}_{\text{aromat}}$ ), 7.40 (2H, d,  $J_{3\text{H}} = 8.0$  Hz  $\text{H}_{\text{aromat}}$ ), 6.70 (5H, m,  $\text{H}_{\text{aromat}}$ ) 4.91 (1H, d,  $J_{3\text{H}} = 9.1$  Hz,  $\text{CH}(\text{OH})$ ), 4.62 (1H, s,  $\text{OH}$ ), 3.36 (1H, m,  $\text{SO}_2\text{CH}$ ), 2.47 (3H, s,  $\text{PhCH}_3$ ), 0.80 (3H, d,  $J_{3\text{H}} = 7.1$  Hz,  $\text{C}(\text{H})\text{CH}_3$ ).  $^{13}\text{C}$  NMR  $\delta$ : 145.38, 139.58, 133.66, 129.96, 129.08, 128.63, 128.58, 127.09 ( $\text{C}_{\text{aromat}}$ ), 73.85 ( $\text{SO}_2\text{C}(\text{H})\text{CH}_3$ ), 65.97 ( $\text{CH}(\text{OH})$ ), 21.71 ( $\text{PhCH}_3$ ), 12.96 ( $\text{C}(\text{H})\text{CH}_3$ ) ppm. Mp.: 190-191 °C.

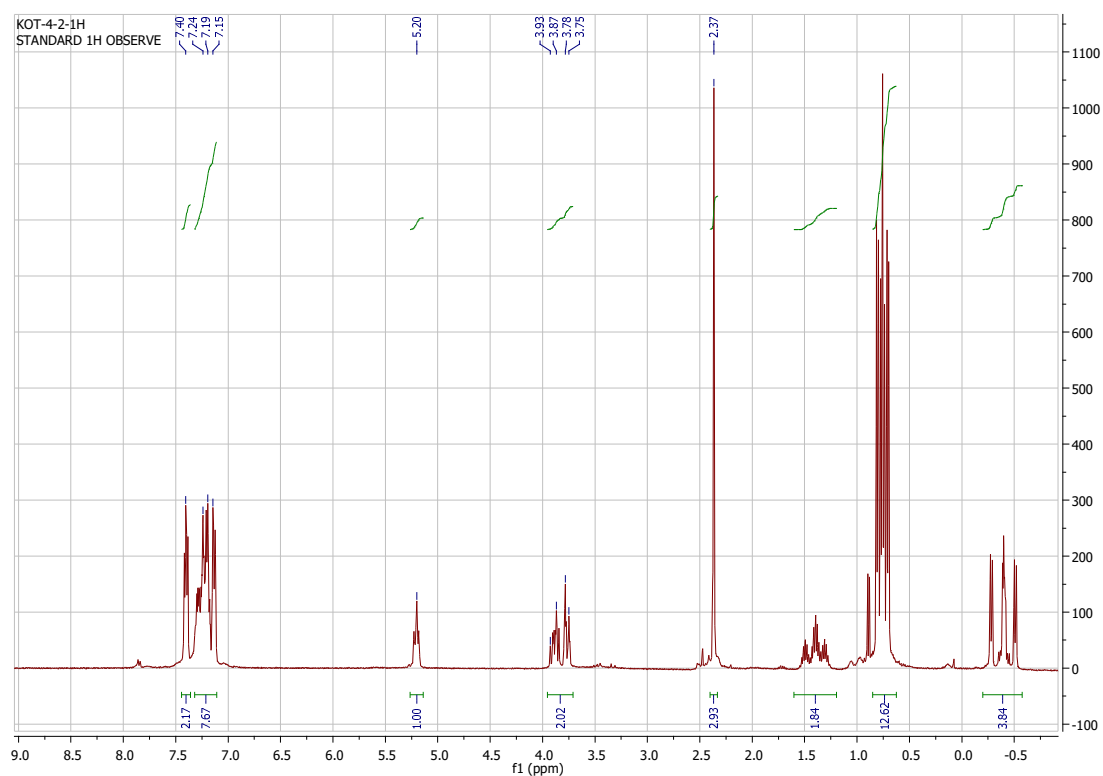

**Figure S1.**  $^1\text{H}$  NMR spectrum of the compound **2aa** – hydroalumination product of a  $\beta$ -keto sulfone **1a** with  $i\text{-Bu}_3\text{Al}$ .

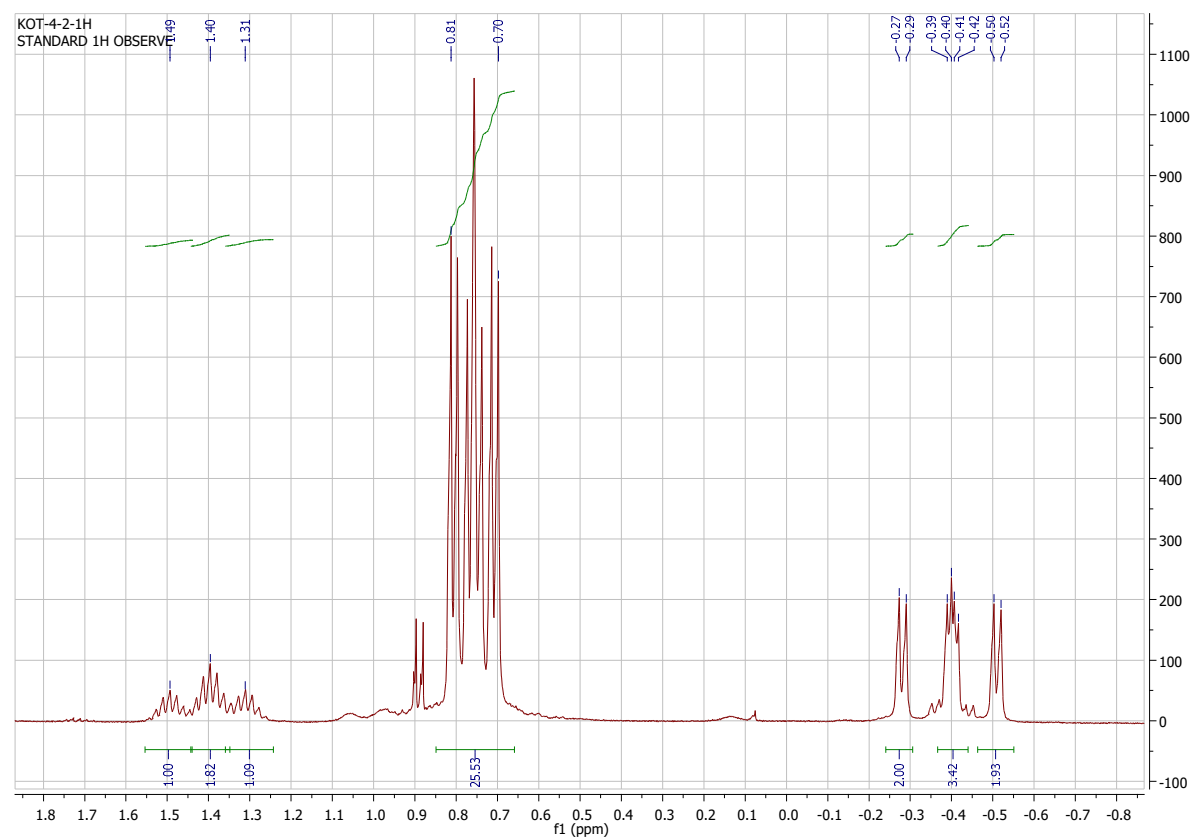

**Figure S2.**  $^1\text{H}$  NMR spectrum of the compound **2aa** – expanded part of the spectrum showing  $i\text{-BuAl}$  proton signals.

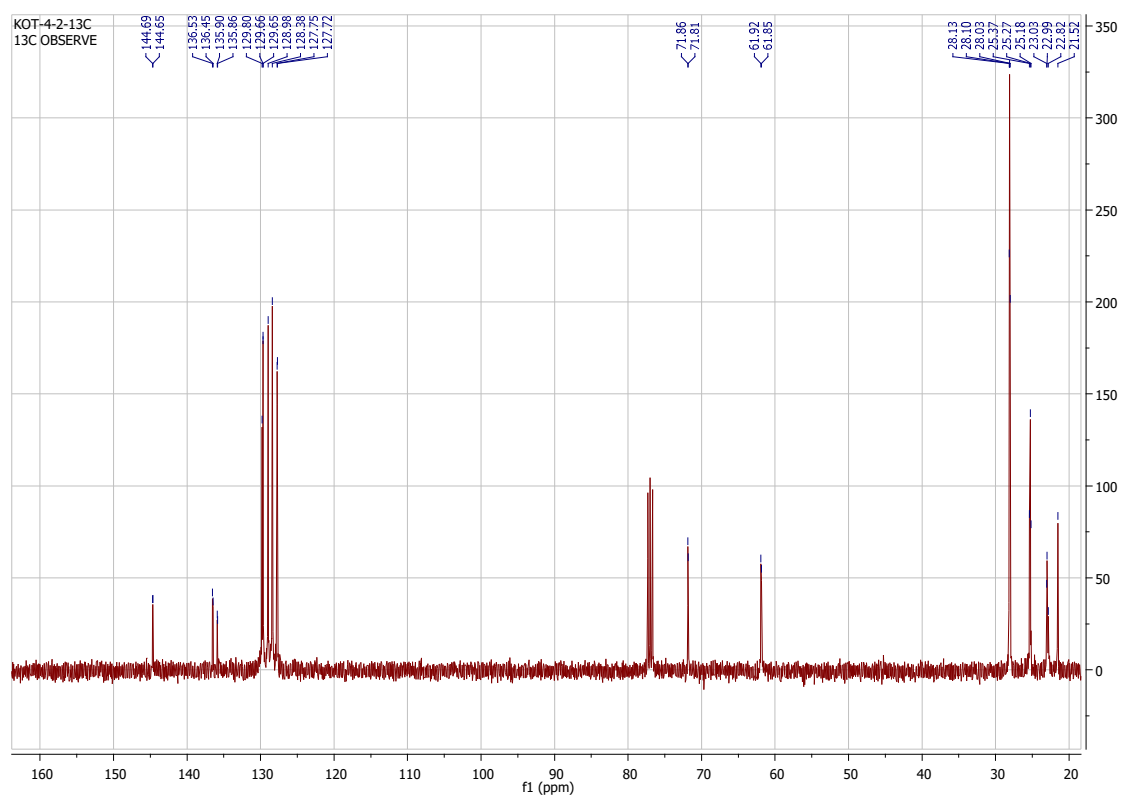

**Figure S3.**  $^{13}\text{C}$  NMR spectrum of the compound **2aa**.

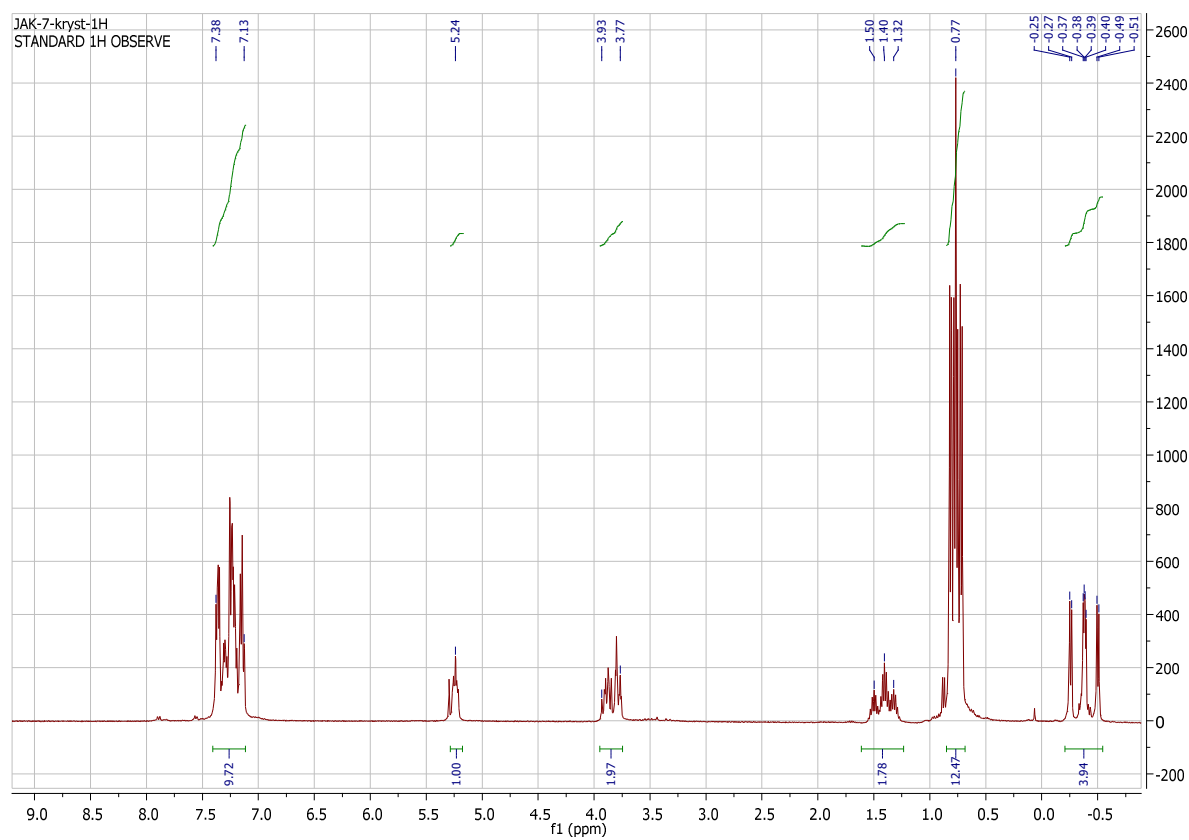

**Figure S4.**  $^1\text{H}$  NMR spectrum of the compound **2ab** – hydroalumination product of a  $\beta$ -keto sulfone **1b** with *i*-Bu<sub>3</sub>Al.

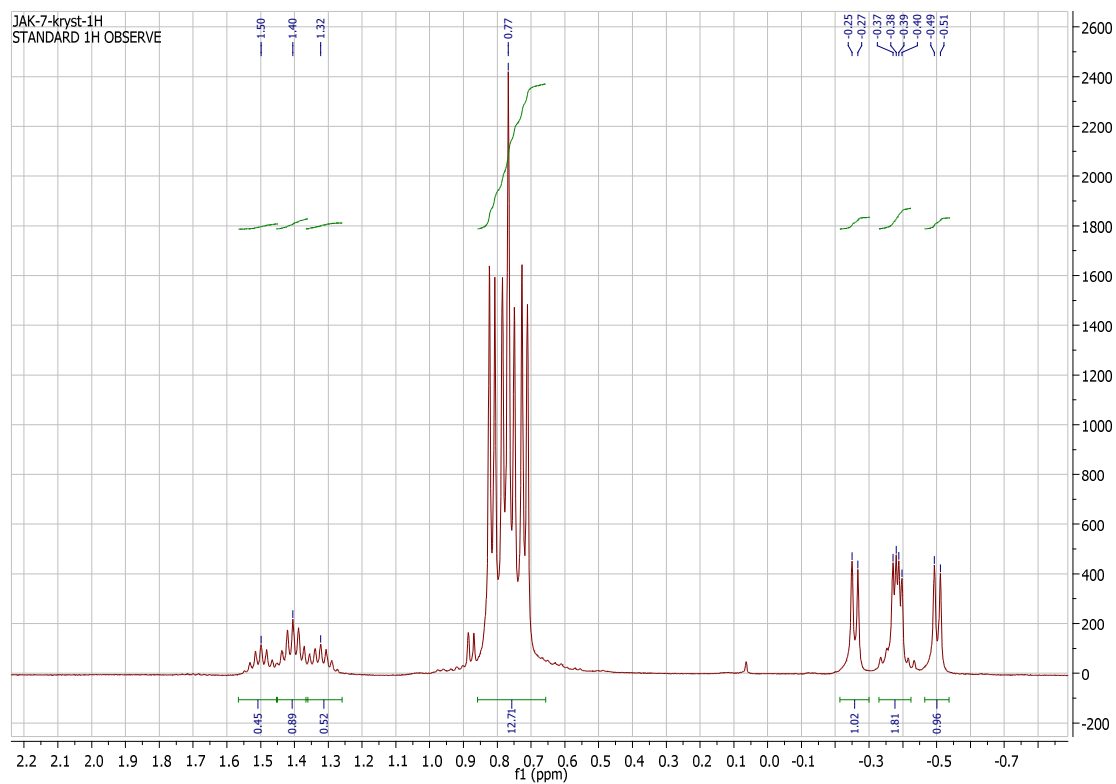

**Figure S5.**  $^1\text{H}$  NMR spectrum of the compound **2ab** – expanded part of the spectrum showing *i*-BuAl proton signals.

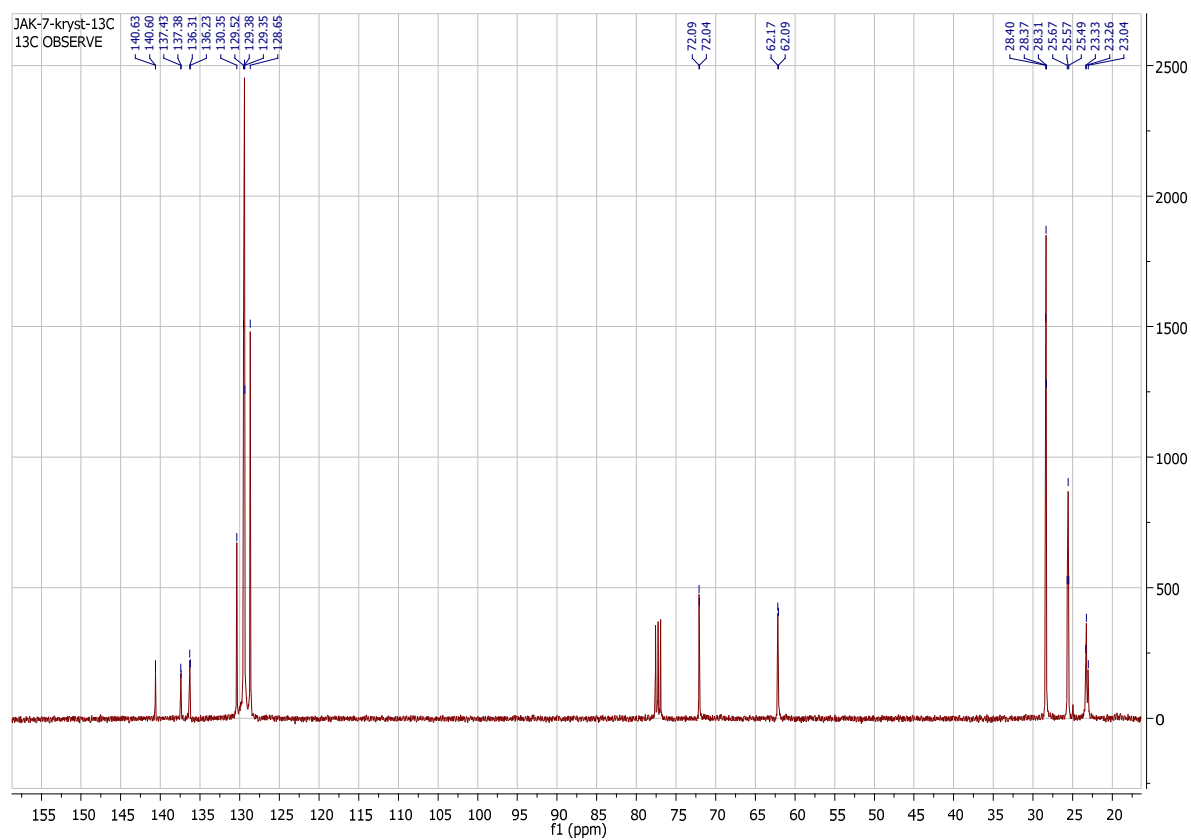

**Figure S6.**  $^{13}\text{C}$  NMR spectrum of the compound **2ab**.

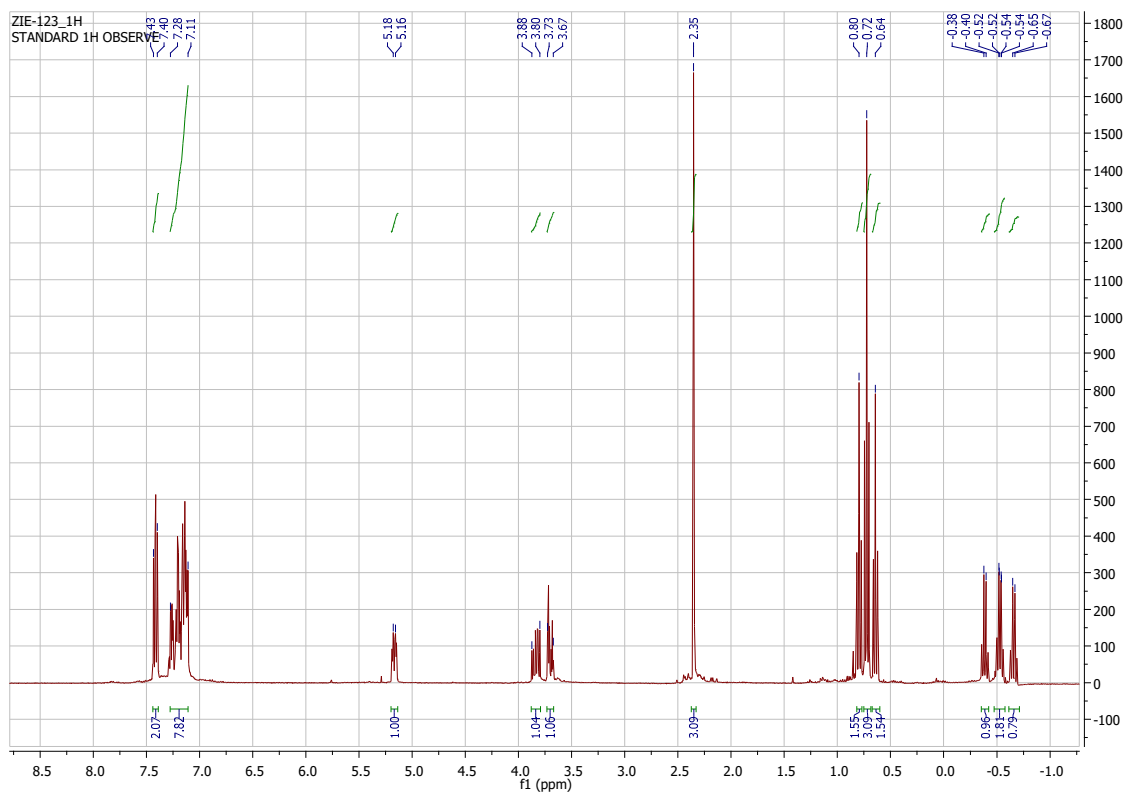

**Figure S7.**  $^1\text{H}$  NMR spectrum of the compound **2ba** – hydroalumination product of a  $\beta$ -keto sulfone **1a** with  $\text{Et}_3\text{Al}$  (1:1).

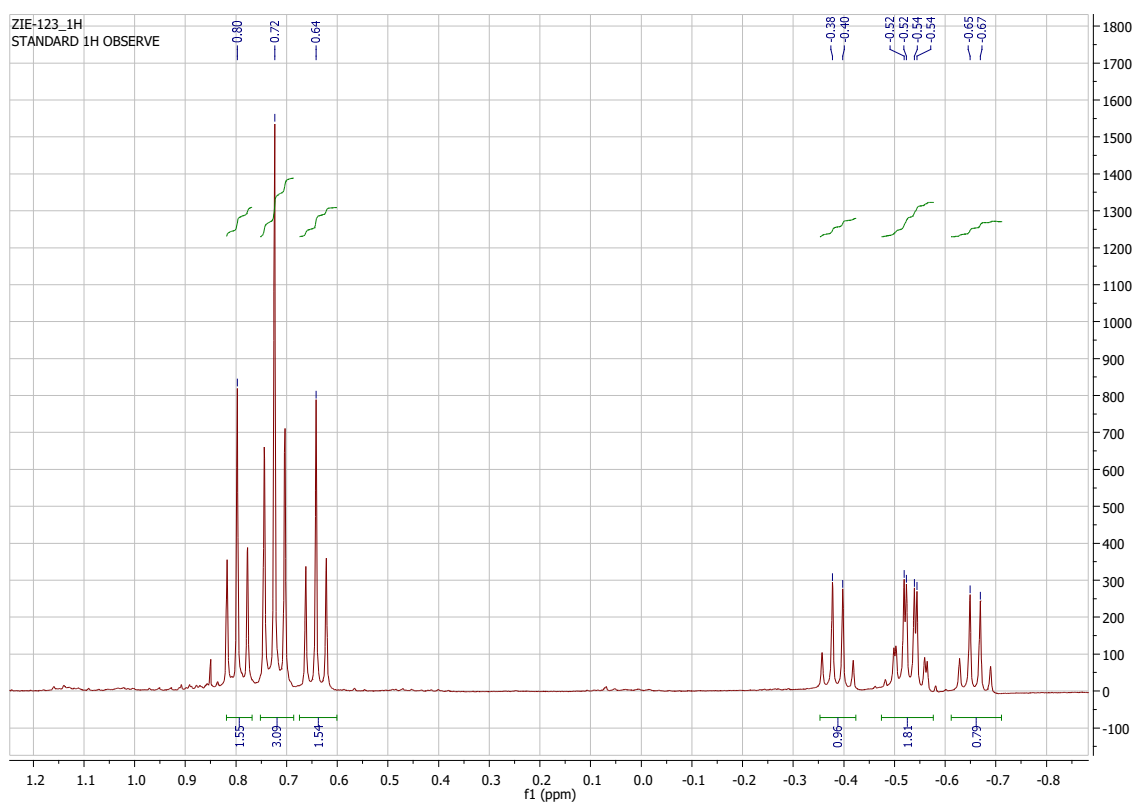

**Figure S8.**  $^1\text{H}$  NMR spectrum of the compound **2ba** – expanded part of the spectrum showing  $\text{EtAl}$  proton signals.

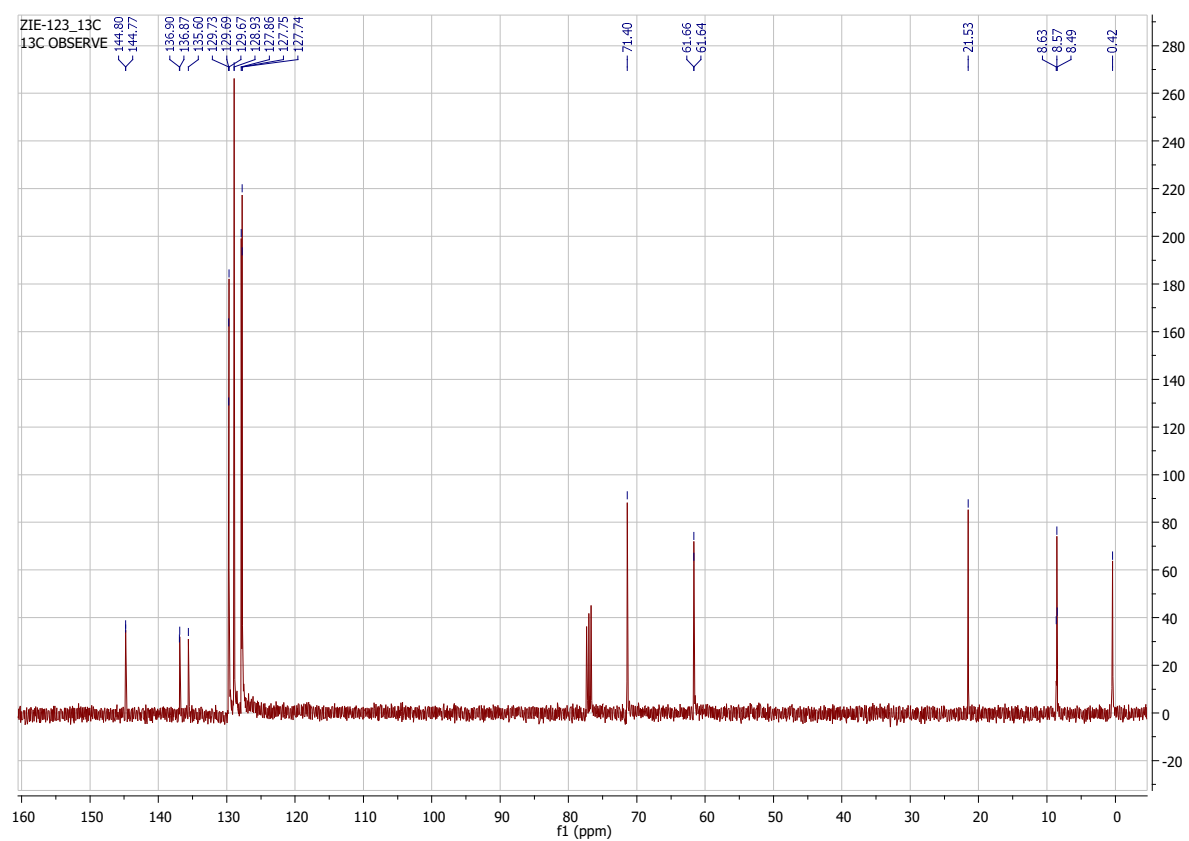

**Figure S9.**  $^{13}\text{C}$  NMR spectrum of the compound **2ba**.

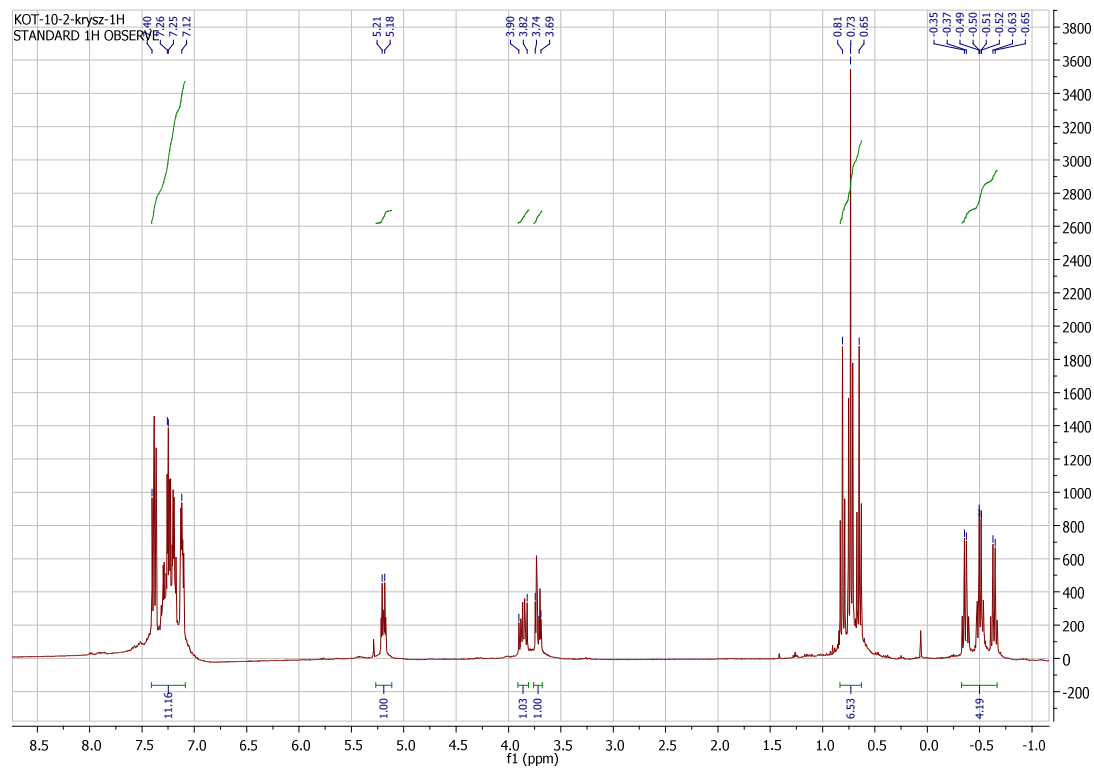

**Figure S10.**  $^1\text{H}$  NMR spectrum of the compound **2bb** – hydroalumination product of  $\beta$ -keto sulfone **1b** with  $\text{Et}_3\text{Al}$  (1:1).



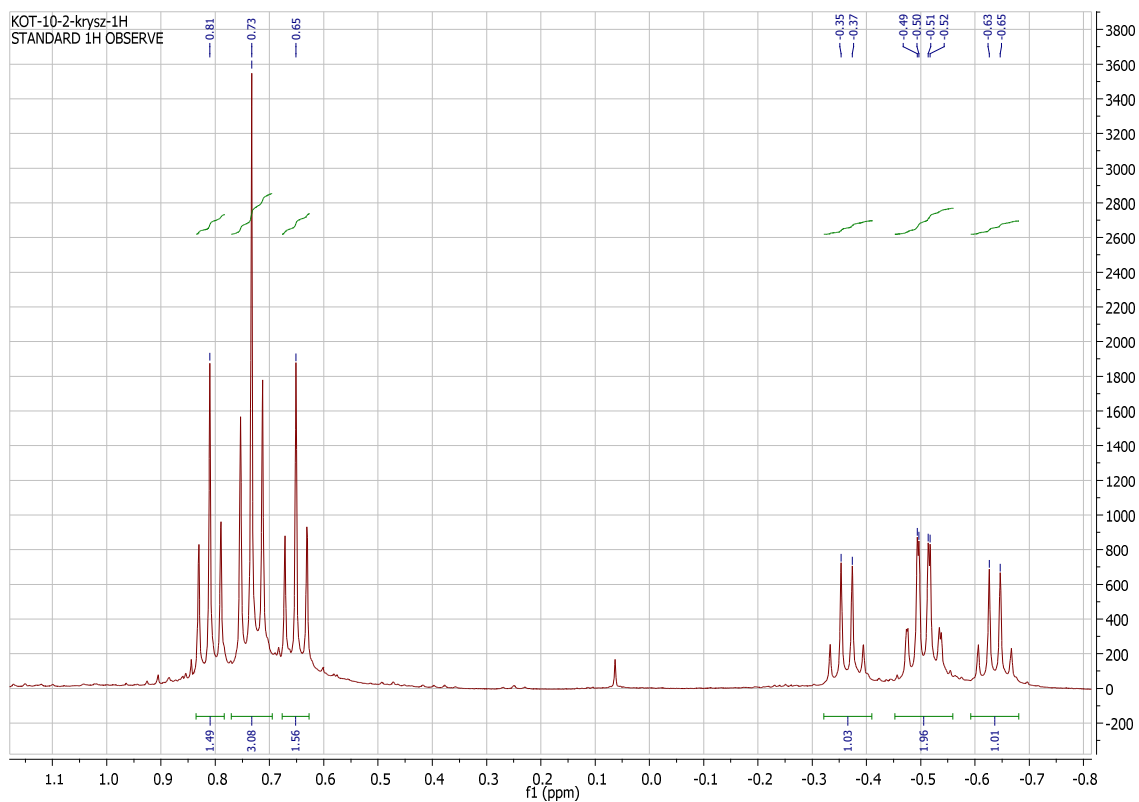

**Figure S11.**  $^1\text{H}$  NMR spectrum of the compound **2bb** – expanded part of the spectrum showing EtAl proton signals.

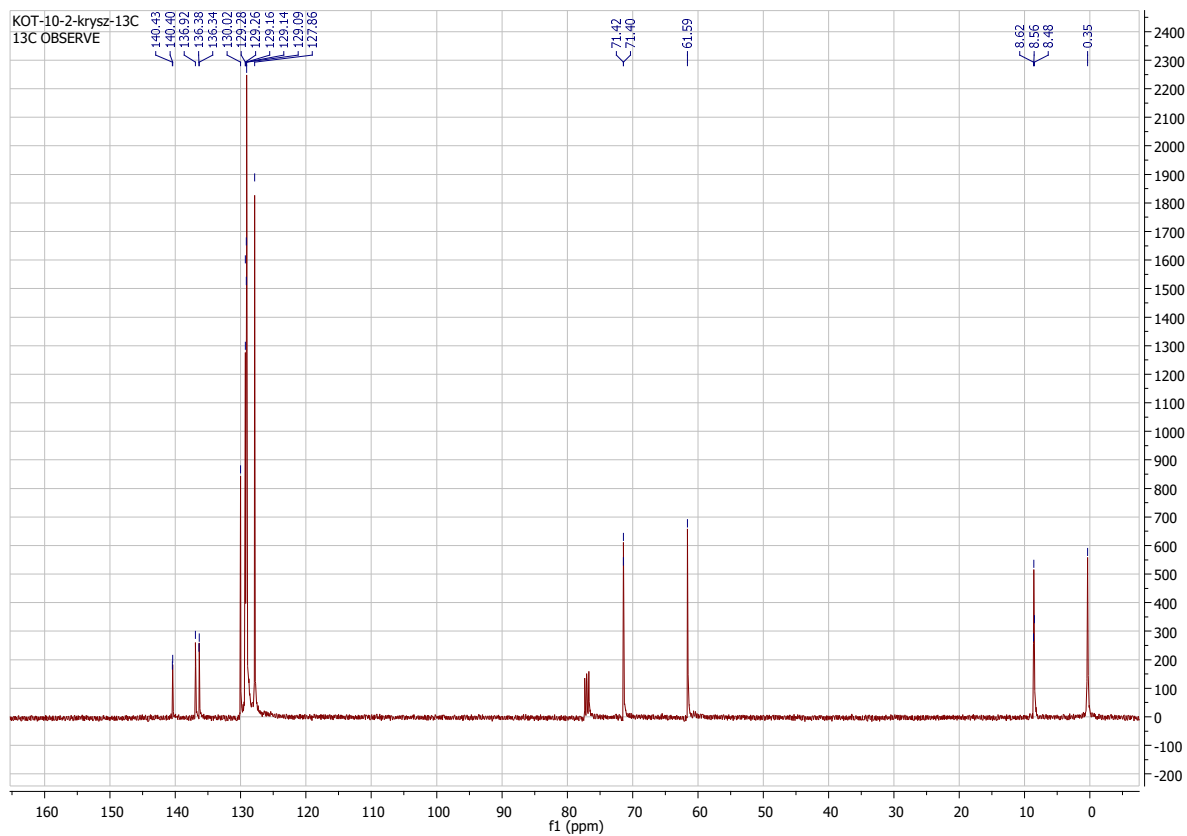

**Figure S12.**  $^{13}\text{C}$  NMR spectrum of the compound **2bb**.

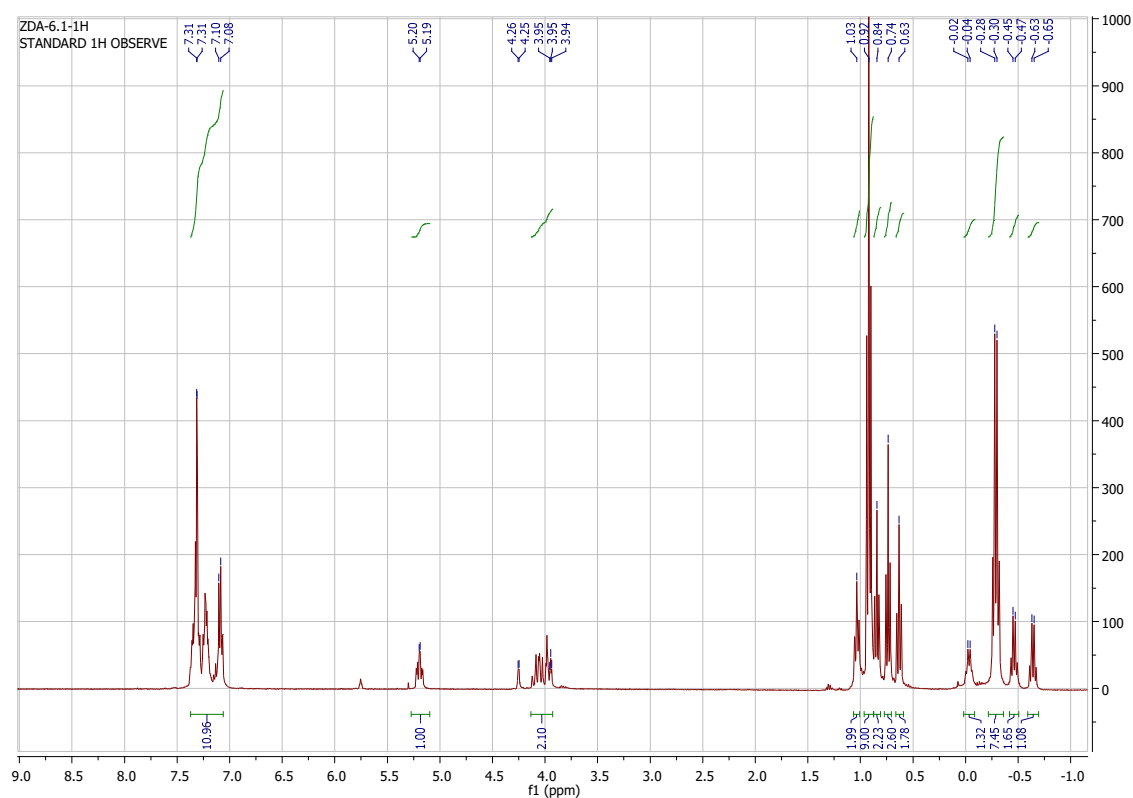

**Figure S13.**  $^1\text{H}$  NMR spectrum of the compound **3bb** – hydroalumination product of a  $\beta$ -keto sulfone **1b** with  $\text{Et}_3\text{Al}$  (1:2).

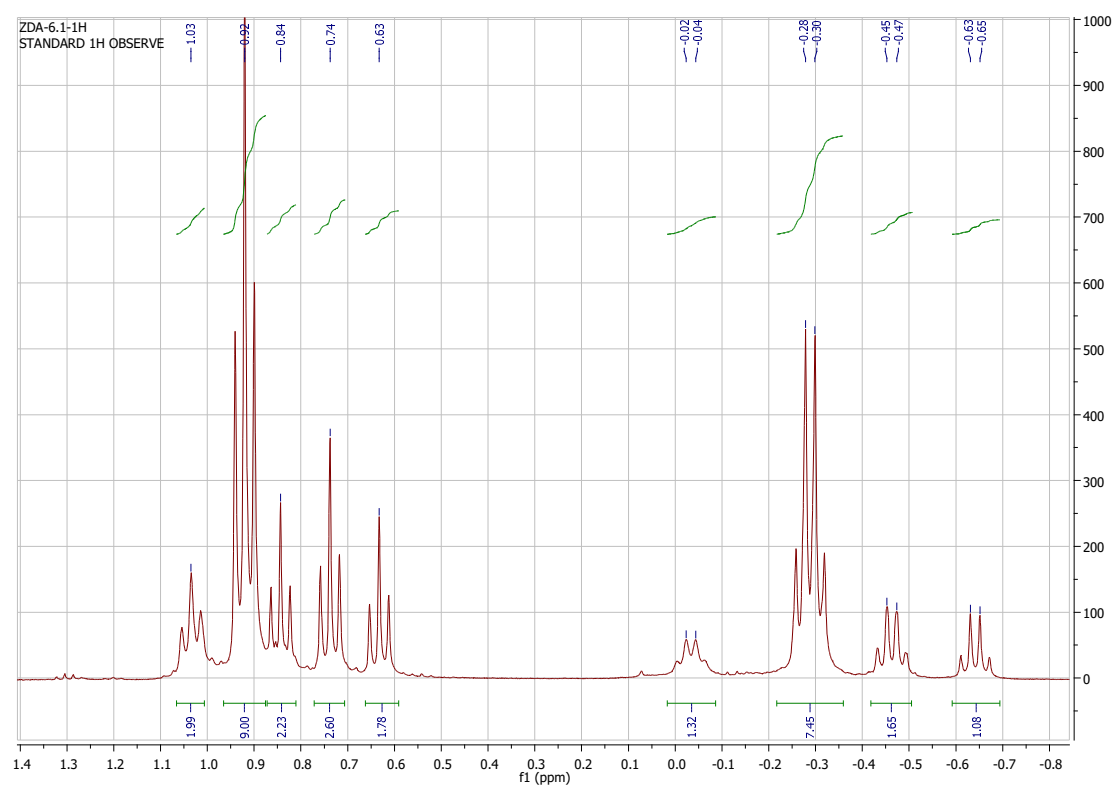

**Figure S14.**  $^1\text{H}$  NMR spectrum of the compound **3bb** – expanded part of the spectrum showing  $\text{EtAl}$  proton signals.

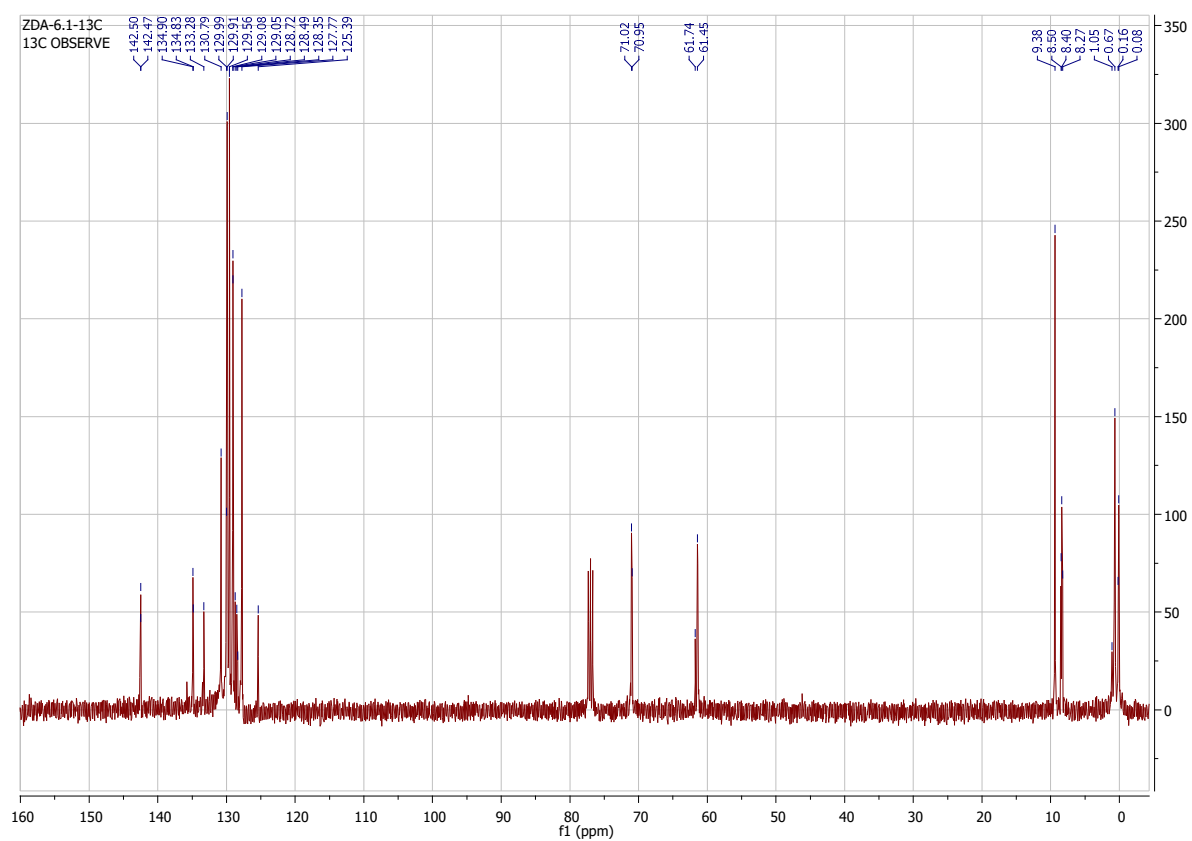

**Figure S15.**  $^{13}\text{C}$  NMR spectrum of the compound **3bb**.

**Table S1.** Crystal data and data collection parameters for the compounds **2aa** and **2ab**.

|                                            | <b>2aa</b>                                                                                                      | <b>2ab</b>                                                                                                                         |
|--------------------------------------------|-----------------------------------------------------------------------------------------------------------------|------------------------------------------------------------------------------------------------------------------------------------|
| Empirical formula                          | C <sub>46</sub> H <sub>66</sub> Al <sub>2</sub> O <sub>6</sub> S <sub>2</sub> ·2CH <sub>2</sub> Cl <sub>2</sub> | C <sub>44</sub> H <sub>60</sub> Al <sub>2</sub> Cl <sub>2</sub> O <sub>6</sub> S <sub>2</sub> ·1.91CH <sub>2</sub> Cl <sub>2</sub> |
| Formula weight                             | 1002.92                                                                                                         | 1037.63                                                                                                                            |
| Temperature (K)                            | 130(2)                                                                                                          | 130(2)                                                                                                                             |
| Wavelength (Å)                             | 0.71073                                                                                                         | 0.71073                                                                                                                            |
| Crystal system                             | triclinic                                                                                                       | triclinic                                                                                                                          |
| Space group                                | P -1                                                                                                            | P -1                                                                                                                               |
| a(Å)                                       | 10.724(2)                                                                                                       | 10.752(3)                                                                                                                          |
| b(Å)                                       | 11.645(2)                                                                                                       | 11.605(3)                                                                                                                          |
| c(Å)                                       | 12.127(2)                                                                                                       | 11.846(3)                                                                                                                          |
| α(°)                                       | 94.927(6)                                                                                                       | 93.97(1)                                                                                                                           |
| β(°)                                       | 102.266(7)                                                                                                      | 102.80(1)                                                                                                                          |
| γ(°)                                       | 115.243(6)                                                                                                      | 114.44(1)                                                                                                                          |
| V(Å <sup>3</sup> )                         | 501.46                                                                                                          | 1290.4(6)                                                                                                                          |
| Z                                          | 2                                                                                                               | 1                                                                                                                                  |
| D <sub>calc</sub> (g cm <sup>-3</sup> )    | 1.270                                                                                                           | 1.335                                                                                                                              |
| Absorption coefficient (mm <sup>-1</sup> ) | 0.383                                                                                                           | 0.488                                                                                                                              |
| F(000)                                     | 532                                                                                                             | 545                                                                                                                                |
| Crystal size (mm)                          | 0.416 × 0.314 × 0.216                                                                                           | 0.270 × 0.261 × 0.212                                                                                                              |
| Θ range for data collection (°)            | 2.17 to 29.04                                                                                                   | 2.1867 to 33.0787                                                                                                                  |
| Index ranges                               | -14 ≤ h ≤ 14, -15 ≤ k ≤ 15,<br>-16 ≤ l ≤ 16                                                                     | -14 ≤ h ≤ 14, -14 ≤ k ≤ 14,<br>-15 ≤ l ≤ 15                                                                                        |
| Reflections collected                      | 56932                                                                                                           | 70819                                                                                                                              |
| Independent reflections                    | 7004 [R(int) = 0.0519]                                                                                          | 7904 [R(int) = 0.0376]                                                                                                             |
| Refinement method                          | Full-matrix least-squares<br>on F <sup>2</sup>                                                                  | Full-matrix least-squares on<br>F <sup>2</sup>                                                                                     |
| Data / restraints / parameters             | 7004 / 0 / 290                                                                                                  | 7904 / 0 / 317                                                                                                                     |
| Goodness-of-fit on F <sup>2</sup>          | 1.120                                                                                                           | 1.041                                                                                                                              |
| Final R indices [I > 2σ(I)]                | R <sub>1</sub> = 0.0534, wR <sub>2</sub> =<br>0.0953                                                            | R <sub>1</sub> = 0.0409, wR <sub>2</sub> = 0.0996                                                                                  |
| R indices (all data)                       | R <sub>1</sub> = 0.0703, wR <sub>2</sub> =                                                                      | R <sub>1</sub> = 0.0568, wR <sub>2</sub> = 0.1118                                                                                  |

0.1030

Max/Min of residual electron density      0.541 and -0.490      0.429 and -0.352

**Table SI2.** Crystal data and data collection parameters for the compounds **2ba**, **2bb** and **3bb**.

|                                            | <b>2ba</b>                                                                    | <b>2bb</b>                                                                                    | <b>3bb</b>                                                                                                                            |
|--------------------------------------------|-------------------------------------------------------------------------------|-----------------------------------------------------------------------------------------------|---------------------------------------------------------------------------------------------------------------------------------------|
| Empirical formula                          | C <sub>38</sub> H <sub>50</sub> Al <sub>2</sub> O <sub>6</sub> S <sub>2</sub> | C <sub>36</sub> H <sub>44</sub> Al <sub>2</sub> Cl <sub>2</sub> O <sub>6</sub> S <sub>2</sub> | C <sub>48</sub> H <sub>74</sub> Al <sub>4</sub> Cl <sub>2</sub> O <sub>6</sub> S <sub>2</sub> ·0.9<br>CH <sub>2</sub> Cl <sub>2</sub> |
| Formula weight                             | 720.86                                                                        | 761.69                                                                                        | 1066.44                                                                                                                               |
| Temperature (K)                            | 130(2)                                                                        | 130(2)                                                                                        | 110(2)                                                                                                                                |
| Wavelength (Å)                             | 0.71073                                                                       | 0.71073                                                                                       | 0.71073                                                                                                                               |
| Crystal system                             | triclinic                                                                     | triclinic                                                                                     | triclinic                                                                                                                             |
| Space group                                | P -1                                                                          | P -1                                                                                          | P -1                                                                                                                                  |
| a(Å)                                       | 8.115(1)                                                                      | 7.9056(7)                                                                                     | 8.359(1)                                                                                                                              |
| b(Å)                                       | 8.713(1)                                                                      | 8.7706(8)                                                                                     | 12.303(2)                                                                                                                             |
| c(Å)                                       | 15.231(2)                                                                     | 14.975(1)                                                                                     | 14.175(2)                                                                                                                             |
| α(°)                                       | 99.119(6)                                                                     | 78.228(4)                                                                                     | 82.222(5)                                                                                                                             |
| β(°)                                       | 99.465(6)                                                                     | 88.124(4)                                                                                     | 85.516(5)                                                                                                                             |
| γ(°)                                       | 114.254(5)                                                                    | 65.893(4)                                                                                     | 75.848(6)                                                                                                                             |
| V(Å <sup>3</sup> )                         | 937.3(3)                                                                      | 926.3(2)                                                                                      | 1399.0(4)                                                                                                                             |
| Z                                          | 1                                                                             | 1                                                                                             | 1                                                                                                                                     |
| D <sub>calc</sub> (g cm <sup>-3</sup> )    | 1.277                                                                         | 1.365                                                                                         | 1.266                                                                                                                                 |
| Absorption coefficient (mm <sup>-1</sup> ) | 0.233                                                                         | 0.379                                                                                         | 0.383                                                                                                                                 |
| F(000)                                     | 384                                                                           | 400                                                                                           | 566                                                                                                                                   |
| Crystal size (mm)                          | 0.432×0.342×0.325                                                             | 0.523×0.285×0.134                                                                             | 0.525×0.188×0.138                                                                                                                     |
| Θ range for data collection (°)            | 2.6675 to 34.9694                                                             | 2.60 to 27.50                                                                                 | 2.4901 to 26.8221                                                                                                                     |
| Index ranges                               | -12 ≤ h ≤ 12, -13 ≤ k ≤ 13, -23 ≤ l ≤ 23                                      | -10 ≤ h ≤ 10, -11 ≤ k ≤ 11, -19 ≤ l ≤ 19                                                      | -10 ≤ h ≤ 10, -15 ≤ k ≤ 15, -17 ≤ l ≤ 17                                                                                              |
| Reflections collected                      | 63588                                                                         | 36618                                                                                         | 38257                                                                                                                                 |
| Independent reflections                    | 6783 [R(int) = 0.0456]                                                        | 4260 [R(int) = 0.0372]                                                                        | 5497 [R(int) = 0.0596]                                                                                                                |

|                                         |                                    |                                    |                                    |
|-----------------------------------------|------------------------------------|------------------------------------|------------------------------------|
| Refinement method                       | Full-matrix least-squares on $F^2$ | Full-matrix least-squares on $F^2$ | Full-matrix least-squares on $F^2$ |
| Data / restraints / parameters          | 6783 / 0 / 220                     | 4260 / 0 / 219                     | 5497 / 33 / 352                    |
| Goodness-of-fit on $F^2$                | 1.170                              | 1.056                              | 1.045                              |
| Final R indices<br>[ $I > 2\sigma(I)$ ] | $R_1 = 0.0508$ , $wR_2 = 0.1196$   | $R_1 = 0.0299$ , $wR_2 = 0.0694$   | $R_1 = 0.0367$ , $wR_2 = 0.0785$   |
| R indices (all data)                    | $R_1 = 0.0596$ , $wR_2 = 0.1236$   | $R_1 = 0.0350$ , $wR_2 = 0.0728$   | $R_1 = 0.0545$ , $wR_2 = 0.0890$   |
| Max/Min of residual electron density    | 1.011 and -0.451                   | 0.403 and -0.395                   | 0.490 and -0.394                   |

---
